# Supplementary material for: Influence of polygenic risk on height and BMI in adults with a 22q11.2 microdeletion
Source: Research Square preprint supplement (doi:10.21203/rs.3.rs-5050172/v1), 2024-09-11
Supplement: Supplementary file 1 [file d31b9ea00418453ec051aeef.docx]

**Supplementary Methods**

**Genome sequencing and variant annotation**

Genome sequencing data used for this study were generated at three sites, and processed, broadly, using two pipelines (Supplementary Figure 1). One hundred individuals were sequenced using the Illumina HiSeq X platform at The Centre for Applied Genomics (TCAG) in Toronto, Canada. Sequencing data for the remaining 260 individuals were generated by the Centre for Disease Research (CIDR) at Johns Hopkins University using the Illumina NovaSeq 6000 platform, TCAG using the Illumina NovaSeq 6000 platform or The International Brain and Behaviour Consortium (IBBC) using the Illumina HiSeq 2500 or Illumina HiSeq X platform (see Supplementary Figure 1 for numbers of samples available from each site).

Detailed sequencing methods and pipeline for the TCAG samples sequenced using Illumina HiSeq X are described in Mojarad et al.1. Briefly, sequenced reads were aligned to the reference genome (GRCh37/hg19) using the Burrows-Wheeler Aligner version 0.7.12 as a sorted binary alignment map (BAM) format. Genome Analysis ToolKit (GATK) (https://gatk.broadinstitute.org/hc/en-us) was used for indel realignment, quality score recalibration and SNV and indel calling (version 3.7.0).

The samples sequenced at TCAG using the Illumina NovaSeq 6000 were processed using DRAGEN Bio-IT Platform (versions 3.8.4). Briefly, the reads generated were aligned to GRCh38 human genome reference (hg38-alt-aware-graph). Small variants (single nucleotide variants (SNVs) and Indel), Copy Number Variants (CNVs), Structural Variants (SVs), HLA and Repeat Expansions were called.

The samples sequenced at CIDR and IBBC were processed using DRAGEN Bio-IT Platform (versions 3.9.5). The reads generated at the two sites were aligned to GRCh38 human genome reference (hg38-altmasked-cnv-graph-anchor respectively). Small variants (SNV and Indel), Copy Number Variants (CNVs), Structural Variants (SVs), HLA and Repeat Expansions were called.

For this study, only the variants in the genomic coordinates listed in published polygenic risk scores for height (PGS002804) and BMI (PGS000027) were used. For the batches where genomes were aligned to GRCh38, the genomic coordinates of the variants in the PRSs were mapped to GRCh37 coordinates to match the genome build of the PRS. Variants located on sex chromosomes or in the 22q11.2 microdeletion LCR22A–D region (chr22:18,912,231–21,465,672 [GRCh37]) were excluded from all analyses.

**Common variant quality control (QC)**

Standard GWAS QC filters were applied, using PLINK v1.9, to the subset of SNPs extracted from sequencing files that were contained in previously constructed population-based polygenic risk scores (height: PGS002804, BMI: PGS000027). SNPs were excluded using the following thresholds: minor allele frequency (MAF) <1%, missingness rate >1%, and Hardy-Weinberg equilibrium exact test p value <1x10-6. Individuals were excluding using the following thresholds: genotype missingness rate >1%, heterozygosity rate that deviated more than three standard deviations from the mean, and king-cutoff of 0.25 (first degree relative). Using these filters, one individual was excluded from subsequent analyses for outlying heterozygosity).

**Principal component analyses (PCA) and ancestry assignment**

To assess ancestry, we first restricted the set of SNPs extracted for PRS analyses to SNPs of previously QC’d 1000 Genomes data with assigned ancestry (http://www.tcag.ca/tools/1000genomes.html). The genotype data of individuals from this study were then merged with the QC’d 1000 Genomes data, and SNPs were pruned using the PLINK command --indep-pairwise (200 variant window size, step size of 100 variants, and pruning variants with r2>0.1), which left 70,248 SNPs. Principal components were then generated using the --pca command.

Ancestry for individuals in this study was assigned first using clinically documented ethnicity. To verify this data, we plotted pair-wise PCs of our cohort, relying primary on the first two, against a backdrop of the assigned ancestry from the QC’d 1000 Genomes data. We visually inspected for any discrepancies between the clinically documented ancestry and where the individual is located in relation to the 1000 Genomes labelled populations on the PCA plots. Six discrepancies were noted where further investigation of clinical records showed that the ancestry inferred by PCA was correct, and these individuals were re-categorized accordingly. Additionally, there were two individuals who appeared to be of European ancestry from PCA, but we confirmed that they had documented indigenous-Canadian status and were of indigenous background on one side of the family (categorized as “mixed”), and were thus excluded from the European ancestry cohort.

**References**

1. Mojarad, B. A. *et al.* Genome sequencing broadens the range of contributing variants with clinical implications in schizophrenia. *Transl Psychiatry* **11**, 1–12 (2021).
